# Supplementary material for: A Drosophila protein-interaction map centered on cell-cycle regulators
Source: PubMed Central journal article supplement (PMC545799; doi:10.1186/gb-2004-5-12-r96), 2004-11-26

BD Proteins

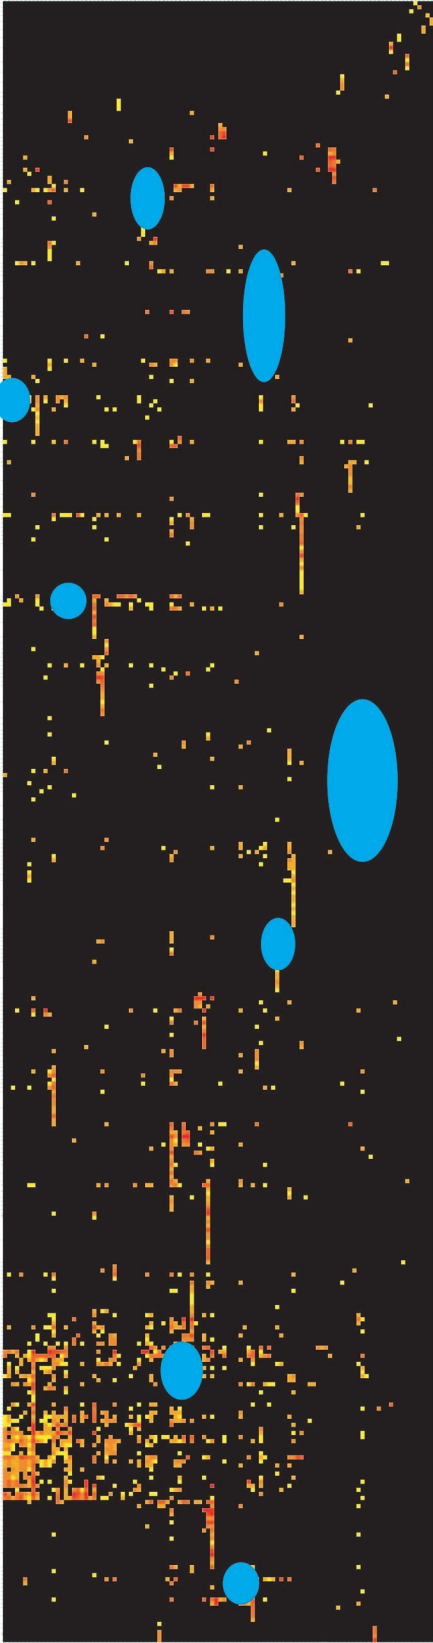

AD Proteins

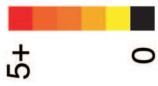

Supplement: gb-2004-5-12-r96-s8.pdf [file gb-2004-5-12-r96-s8.pdf]
